# Supplementary material for: Improvement of selectivity for CO2 reduction by using Cu2ZnSnS4 electrodes modified with different buffer layers (CdS and In2S3) under visible light irradiation
Source: Royal Society of Chemistry journal article supplement (doi:10.1039/c6ra22546b), 2016-01-01
Supplement: c6ra22546b1.pdf [file c6ra22546b1.pdf]

Electronic Supporting Information (ESI) for

**Improvement of selectivity for CO<sub>2</sub> reduction by using Cu<sub>2</sub>ZnSnS<sub>4</sub> electrodes modified with different buffer layers (CdS and In<sub>2</sub>S<sub>3</sub>) under visible light irradiation**

Sunao Kamimura,<sup>1,2,3</sup> Yousuke Sasaki,<sup>1</sup> Masaki Kanaya,<sup>1</sup> Toshiki Tsubota,<sup>1</sup> and Teruhisa Ohno<sup>1,3,4\*</sup>

<sup>1</sup>Department of Applied Chemistry, Faculty of Engineering, Kyushu Institute of Technology, 1-1 Sensuicho, Tobata, Kitakyushu 804-8550, Japan

<sup>2</sup>PRESTO, Japan Science and Technology Agency, 4-1-8 Honcho, Kawaguchi-shi, Saitama 322-0012, Japan

<sup>3</sup> Research Center for Advanced Eco-fitting Technology, Kyushu Institute of Technology, 1-1 Sensuicho, Tobata, Kitakyushu 804-8550, Japan

<sup>4</sup> ACT-C, Japan Science and Technology Agency, 4-1-8 Honcho, Kawaguchi-shi, Saitama 322-0012, Japan

< Contents >

ESI. Fig. S1 Current-potential curves of bare CZTS electrode with various conditions.

ESI. Fig. S2 Current-potential curves for Pt/CZTS, Pt/CdS/CZTS and Pt/In<sub>2</sub>S<sub>3</sub>/CZTS.

ESI. Fig. S4 Mott–Schottky plots for the bare CZTS electrode.

ESI. Table S1 Photoelectrochemical CO<sub>2</sub> reduction by using various CZTS electrode.

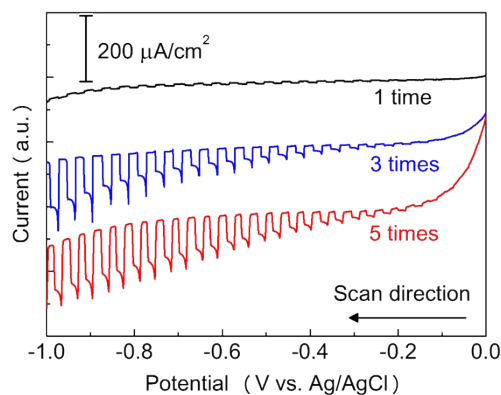

**Figure S1.** Dependence of the photocurrent response of the CZTS electrode on the number of times of spin-coating. The electrolyte was CO<sub>2</sub>-purged 0.1 M NaHCO<sub>3</sub> solution, and light source was Xe lamp attached with cut-off filters ( $420 < \lambda < 800$  nm, 100 mW/cm<sup>2</sup>). More than 5 times spin-coating, a crack was appeared in bare CZTS electrode. Thereby, we concluded that 5 times spin-coating is the best for maximum efficiency of the photoelectrode.

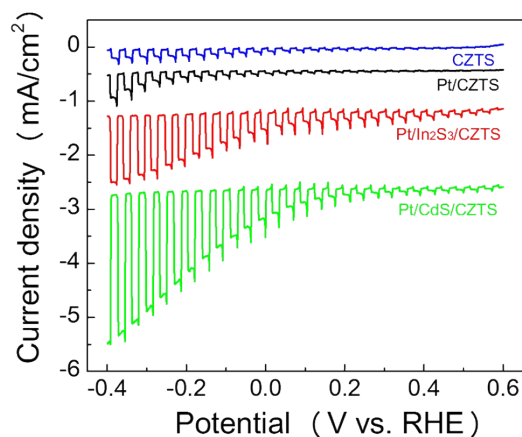

**Figure S2.** Current-potential curves for Pt/CZTS, Pt/CdS/CZTS and Pt/In<sub>2</sub>S<sub>3</sub>/CZTS in 0.1 M NaHCO<sub>3</sub> solution under chopped visible light irradiation ( $420 < \lambda < 800$  nm, 100 mW/cm<sup>2</sup>).

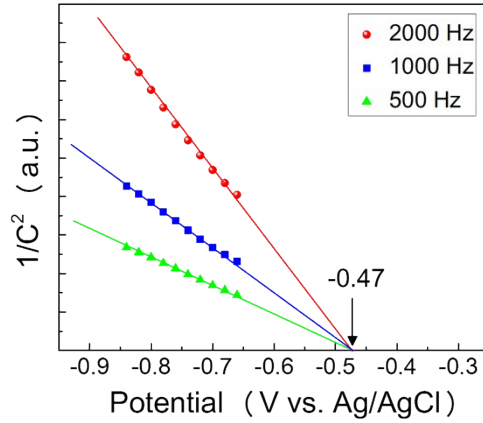

**Figure S3.** Mott–Schottky plots at 500 Hz, 1000 Hz and 2000 Hz measured under dark conditions by using the CZTS electrode in  $\text{Na}_2\text{SO}_4 + \text{NaOH}$  solution (pH 9.5).

Mott–Schottky analysis was carried out to clarify the band potential of CZTS electrode. Negative slopes were observed at all AC frequencies, suggesting that CZTS behaves as a p-type semiconductor. In the case of p-type semiconductors,  $E_{fb}$  is generally located near the VB, and it can be estimated from the intersection of a plot of  $1/C^2$  against  $E$  by the following equation [19]:

$$\frac{1}{C^2} = \frac{2}{e\epsilon\epsilon_0 N} \left( E - E_{fb} - \frac{kT}{e} \right),$$

where  $C$  is capacitance,  $e$  is the electron charge,  $\epsilon$  is the dielectric constant,  $\epsilon_0$  is permittivity of vacuum,  $N$  is an acceptor density,  $E$  is the electrode potential,  $E_{fb}$  is the flat band potential,  $k$  is the Boltzmann constant, and  $T$  is temperature. As shown in **Fig. S3**, the x-axis intersection was  $E = -0.47$  V versus Ag/AgCl for all frequencies (500 Hz, 1000 Hz and 2000 Hz) and can be used to determine  $E_{fb}$  from the above equation  $E = E_{fb} - kT/e$ . This calculation showed that  $E_{fb}$  was approximately +0.06 V vs. Ag/AgCl at pH 0 by correcting the solution pH using the relation  $E = E_0 - 0.059V(\text{pH})$ . This result indicated that the VB potential and CB potential of CZTS are approximately +0.26 V and –1.25 V vs. normal hydrogen electrode (NHE) at pH 0, respectively.

**Table S1.** Photoelectrochemical CO<sub>2</sub> reduction by using various CZTS electrode.<sup>a</sup>

| Entry | Sample                                  | CO <sub>2</sub> | Coulomb /C | Products                   |                             |          |                |             |                    | Total /% |
|-------|-----------------------------------------|-----------------|------------|----------------------------|-----------------------------|----------|----------------|-------------|--------------------|----------|
|       |                                         |                 |            | H <sub>2</sub> / $\mu$ mol | F. E. for H <sub>2</sub> /% | CO /nmol | F. E. for CO/% | HCOOH /nmol | F. E. for HCOOH /% |          |
| 1     | CZTS                                    | ○               | 0.8        | 3                          | 72                          | 59       | 1.4            | 110         | 2.7                | 76.1     |
| 2     | CZTS                                    | ○               | 0.8        | 3                          | 70                          | 69       | 1.6            | 92          | 2.1                | 74.1     |
| 3     | CZTS                                    | ○               | 1.0        | 4.9                        | 81                          | 57       | 0.9            | 139         | 2.3                | 84.2     |
| 4     | CZTS                                    | × <sup>b</sup>  | 0.4        | 1.3                        | 63                          | n.d.     | 0              | n.d.        | 0.0                | 63.0     |
| 5     | CZTS                                    | × <sup>b</sup>  | 0.7        | 2.3                        | 60                          | n.d.     | 0              | n.d.        | 0.0                | 60.0     |
| 6     | CZTS                                    | × <sup>b</sup>  | 0.5        | 1.7                        | 65                          | n.d.     | 0              | n.d.        | 0.0                | 65.0     |
| 7     | CdS/CZTS                                | ○               | 1.2        | 5.0                        | 80                          | 435      | 7.0            | 75          | 1.2                | 88.2     |
| 8     | CdS/CZTS                                | ○               | 2.0        | 7.4                        | 72                          | 810      | 7.8            | 110         | 1.1                | 80.6     |
| 9     | CdS/CZTS                                | ○               | 1.4        | 5.2                        | 73                          | 531      | 7.4            | 62          | 0.9                | 81.3     |
| 10    | In <sub>2</sub> S <sub>3</sub> /CZTS    | ○               | 1.1        | 4.1                        | 72                          | 194      | 3.4            | 266         | 4.7                | 80.1     |
| 11    | In <sub>2</sub> S <sub>3</sub> /CZTS    | ○               | 0.8        | 2.7                        | 67                          | 165      | 4.1            | 190         | 4.8                | 75.9     |
| 12    | In <sub>2</sub> S <sub>3</sub> /CZTS    | ○               | 1.0        | 3.9                        | 77                          | 146      | 2.9            | 210         | 4.2                | 84.1     |
| 13    | Pt/CdS/CZTS                             | ○               | 6.9        | 20                         | 56                          | trace    | 0              | trace       | 0                  | 56.0     |
| 14    | Pt/CdS/CZTS                             | ○               | 5.8        | 20                         | 66.1                        | 14       | 0.05           | 7.9         | 0.03               | 66.2     |
| 15    | Pt/CdS/CZTS                             | ○               | 5.4        | 22                         | 79                          | 4.3      | 0.01           | 24          | 0.09               | 79.1     |
| 16    | Pt/In <sub>2</sub> S <sub>3</sub> /CZTS | ○               | 5.8        | 23                         | 77                          | trace    | 0              | trace       | 0                  | 77.0     |
| 17    | Pt/In <sub>2</sub> S <sub>3</sub> /CZTS | ○               | 5.4        | 21                         | 81                          | 1.9      | 0.009          | 61.7        | 0.27               | 81.3     |
| 18    | Pt/In <sub>2</sub> S <sub>3</sub> /CZTS | ○               | 6.9        | 22                         | 62.2                        | 34       | 0.09           | 264         | 0.74               | 63.0     |
| 19    | CZTS                                    | × <sup>c</sup>  | 0.3        | 1.3                        | 69                          | n.d.     | 0.0            | 19          | 1.1                | 70.1     |
| 20    | CdS/CZTS                                | × <sup>c</sup>  | 0.3        | 1.4                        | 80                          | n.d.     | 0.0            | n.d.        | 0                  | 80.0     |
| 21    | In <sub>2</sub> S <sub>3</sub> /CZTS    | × <sup>c</sup>  | 0.4        | 1.7                        | 77                          | n.d.     | 0              | 20          | 0.9                | 77.9     |

<sup>a</sup> Irradiated at visible light ( $420 < \lambda < 800$  nm, 100 mW/cm<sup>2</sup>) for 1 h in aqueous 0.1 M NaHCO<sub>3</sub> solution at -1.0 V vs. Ag/AgCl. <sup>b</sup> Under Ar-purged Na<sub>2</sub>SO<sub>4</sub> aqueous solution. <sup>c</sup> Under N<sub>2</sub>-purged NaHCO<sub>3</sub> aqueous solution.
